# Supplementary material for: Photocatalytic reduction of CO2coupled with selective alcohol oxidation under ambient conditions
Source: Royal Society of Chemistry journal article supplement (doi:10.1039/c5cy00772k), 2015-01-01
Supplement: c5cy00772k1.pdf [file c5cy00772k1.pdf]

## Supporting Information for

### **Photocatalytic Reduction of CO<sub>2</sub> Coupling with Alcohol Selectivity Oxidation under Ambient Conditions**

*Liuji Wang<sup>a,b</sup>, Xiaoliang Zhang<sup>b\*</sup>, Longhua Yang<sup>a</sup>, Chao Wang<sup>a</sup>, and Hongming  
Wang<sup>a\*</sup>*

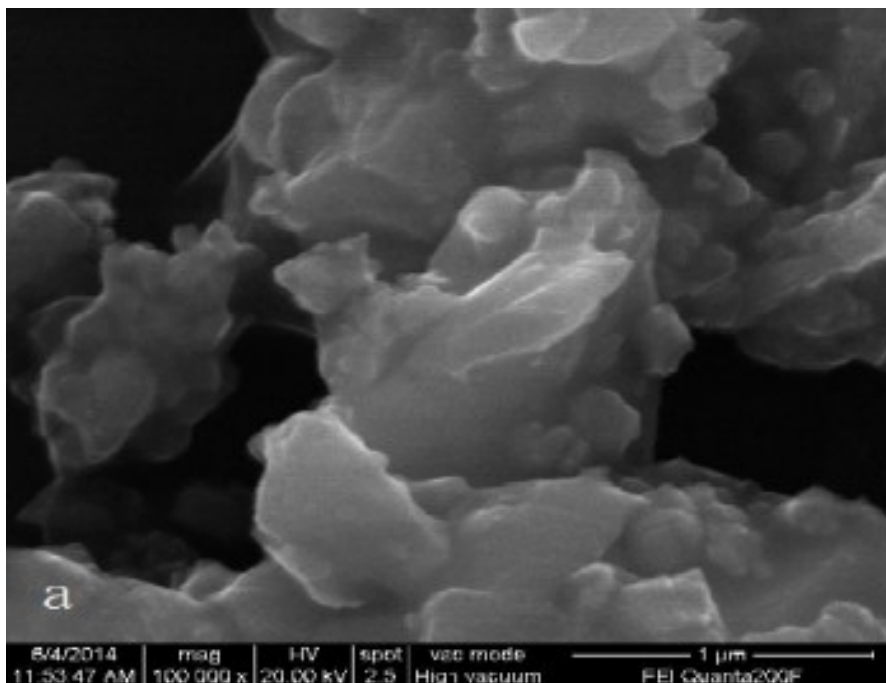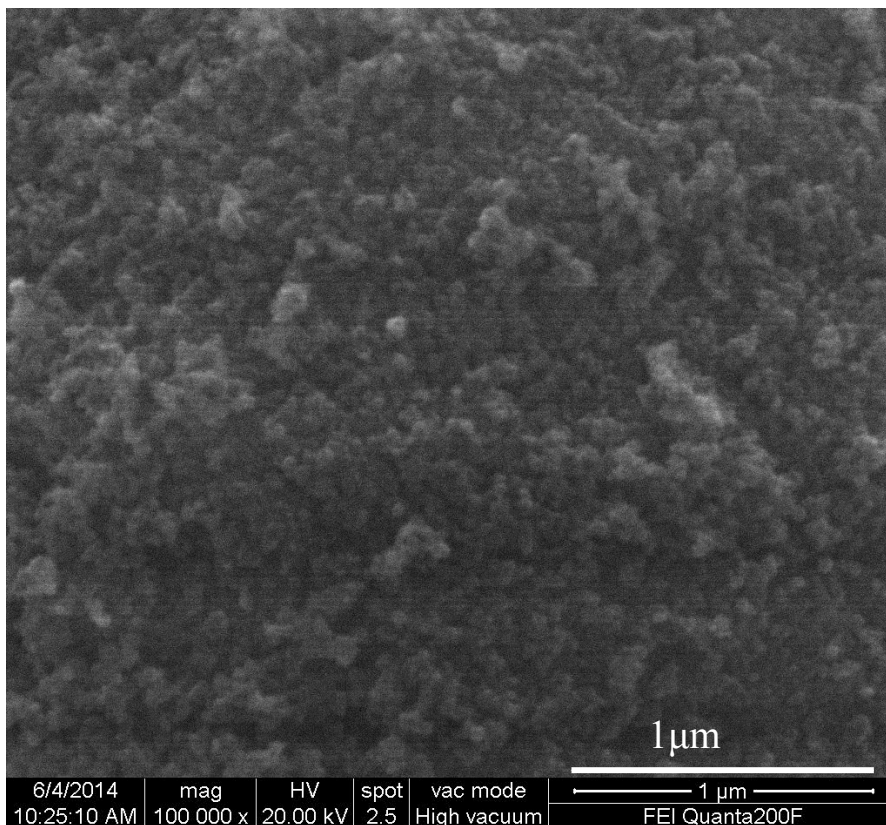

Figure S1. (a) SEM image of  $\text{TiO}_2$  calcined at  $500^\circ\text{C}$  for 2 hours. (b) Representative SEM image of Ag/ $\text{TiO}_2$  nanocomposite.

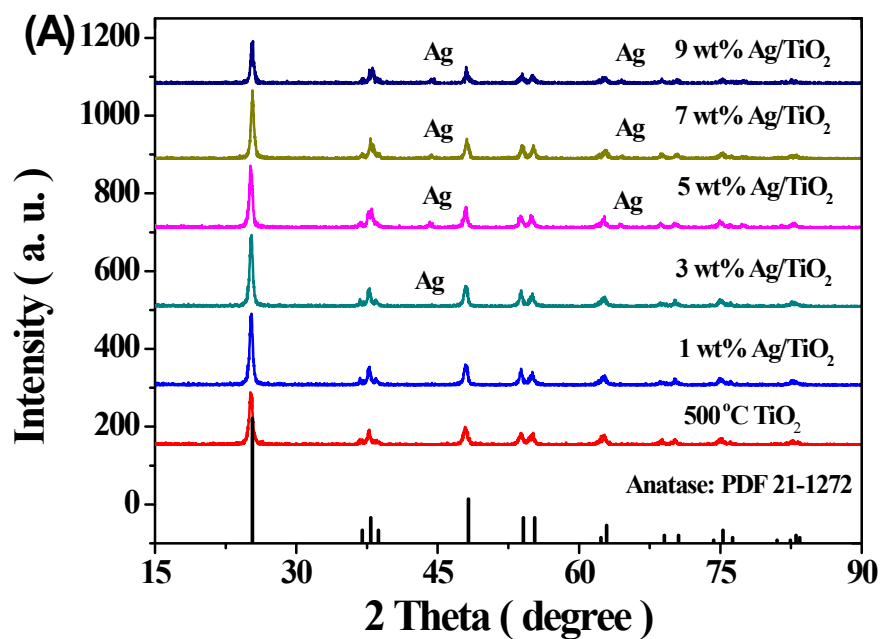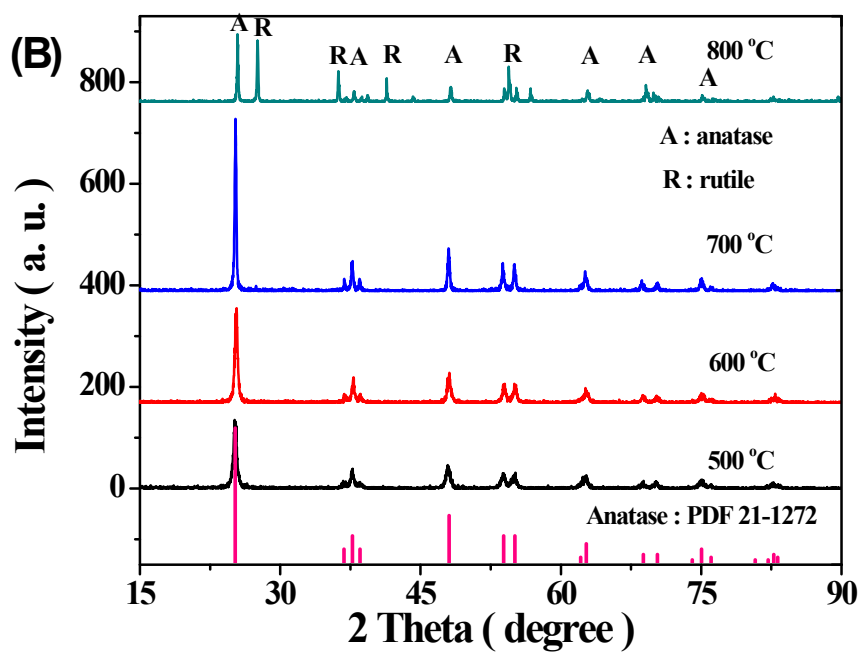

**Figure S2.** (A) XRD patterns of the samples calcined at different temperatures. (B) XRD patterns of Ag/TiO<sub>2</sub> calcined at 500°C for 2 hours loading with different silver.

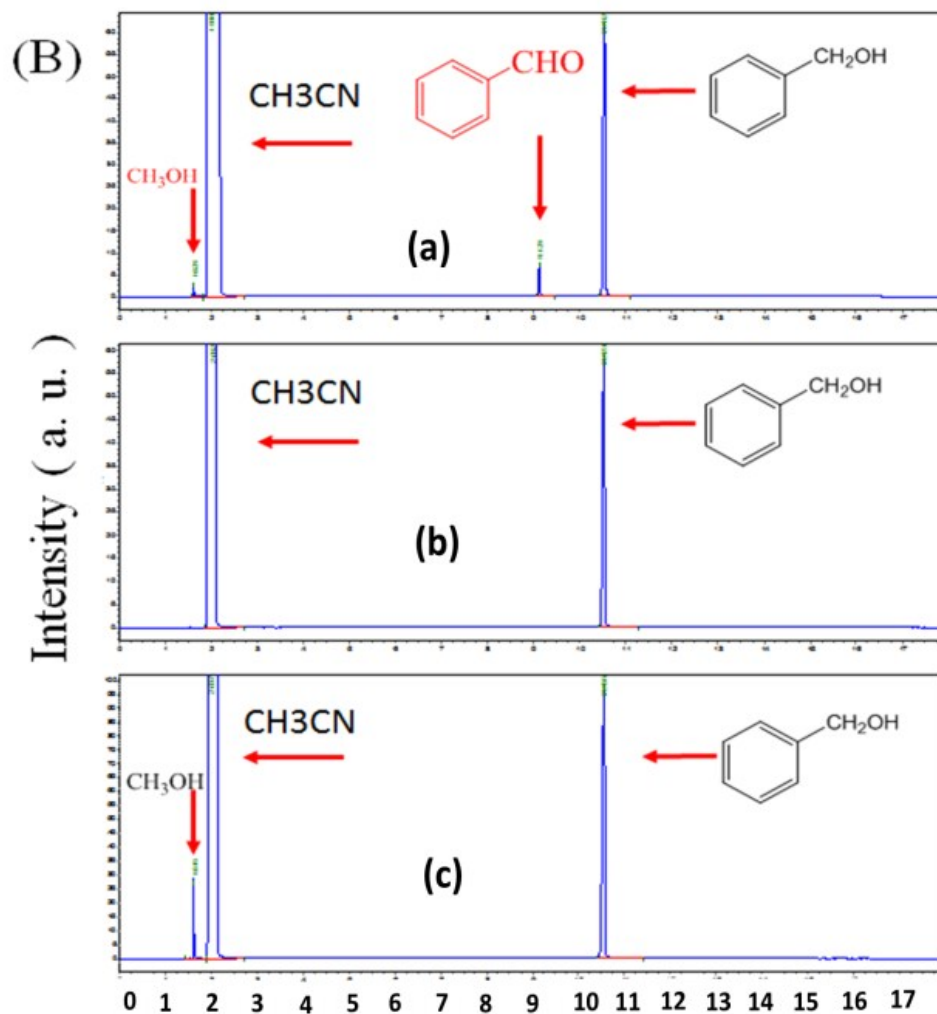

Figure S3. GC chromatograms of (a) product (MeOH) after irradiation for 18 hours and (b) before irradiation and (c) the stand CH<sub>3</sub>OH and benzyl alcohol in CH<sub>3</sub>CN.

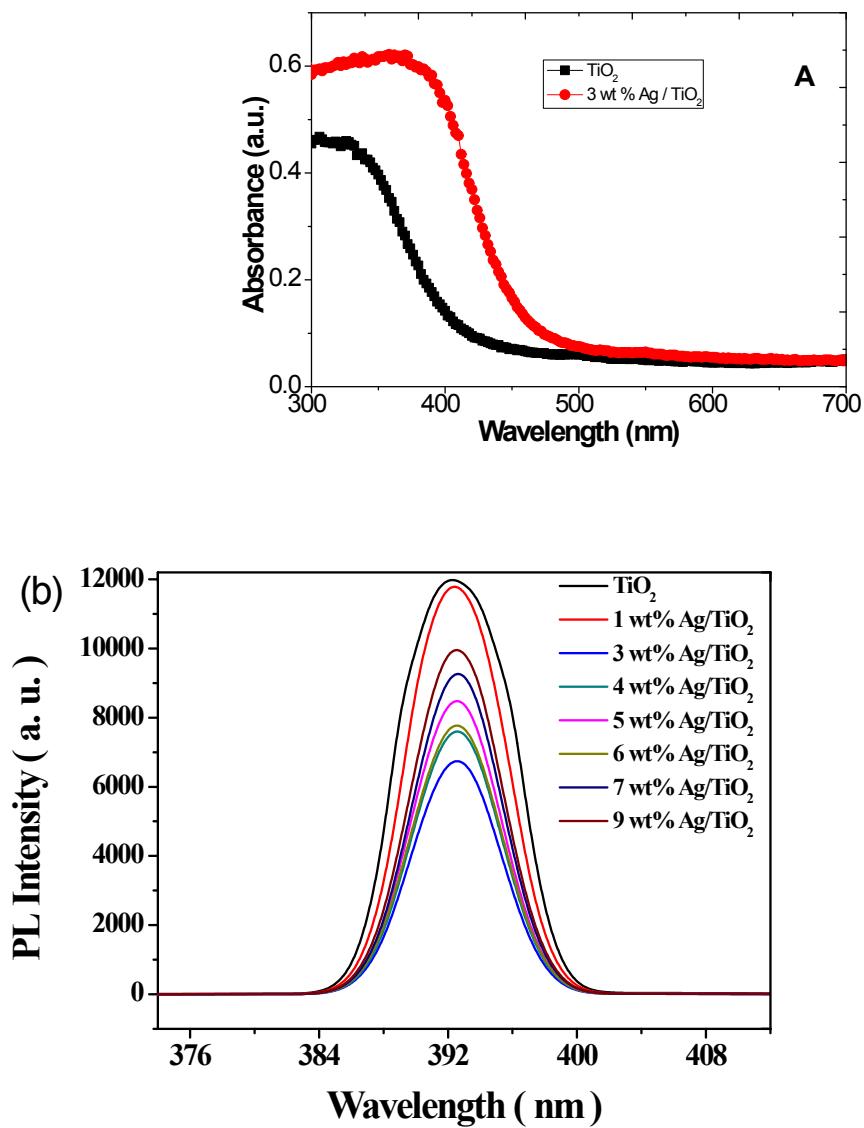

Figure S4. ( A)UV-vis DSR spectra of TiO<sub>2</sub> with different Ag loading content catalysts and (B) photoluminescence spectra of TiO<sub>2</sub> with different Ag loading content catalysts : Ex : 265 nm.
